# Supplementary material for: The Crocus sativus Compounds trans-Crocin 4 and trans-Crocetin Modulate the Amyloidogenic Pathway and Tau Misprocessing in Alzheimer Disease Neuronal Cell Culture Models
Source: PubMed Central journal article supplement (PMC6443833; doi:10.3389/fnins.2019.00249), 2019-03-26
Supplement: Data_Sheet_1.pdf [file Data_Sheet_1.pdf]

# The *Crocus sativus* compounds *trans*-crocin 4 and *trans*-crocetin modulate the amyloidogenic pathway and tau misprocessing in Alzheimer disease neuronal cell culture models

Ioanna Chalatsa<sup>1†</sup>, Demetrios A. Arvanitis<sup>2†</sup>, Nikolaos Stavros Koulakiotis<sup>3</sup>, Athina Giagini<sup>1</sup>, Alexios Leandros Skaltsounis<sup>4</sup>, Zeta Papadopoulou-Daifoti<sup>5‡</sup>, Anthony Tsbopoulos<sup>3,5</sup>, \*Despina Sanoudou<sup>1,2,6\*</sup>

## Correspondence:

Despina Sanoudou, PhD FACMG

E-mail [dsanoudou@med.uoa.gr](mailto:dsanoudou@med.uoa.gr)

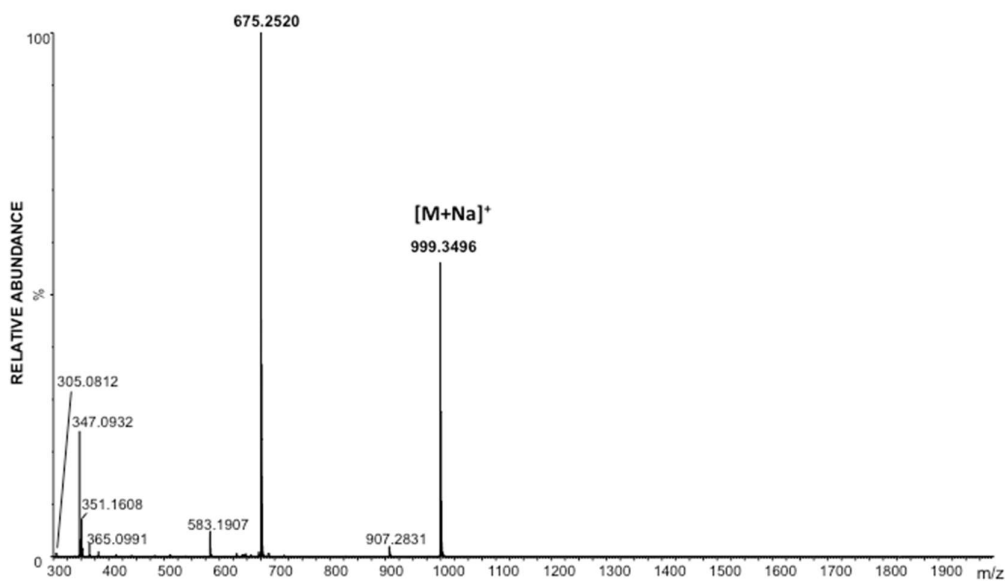

**Supplementary Figure 1:** Positive-ion ESI product ion spectrum of the  $[M+Na]^+$  precursor ions of *trans*-crocetin utilizing a Waters Premier quadrupole reflectron time-of-flight (QqRTOF) mass spectrometer.

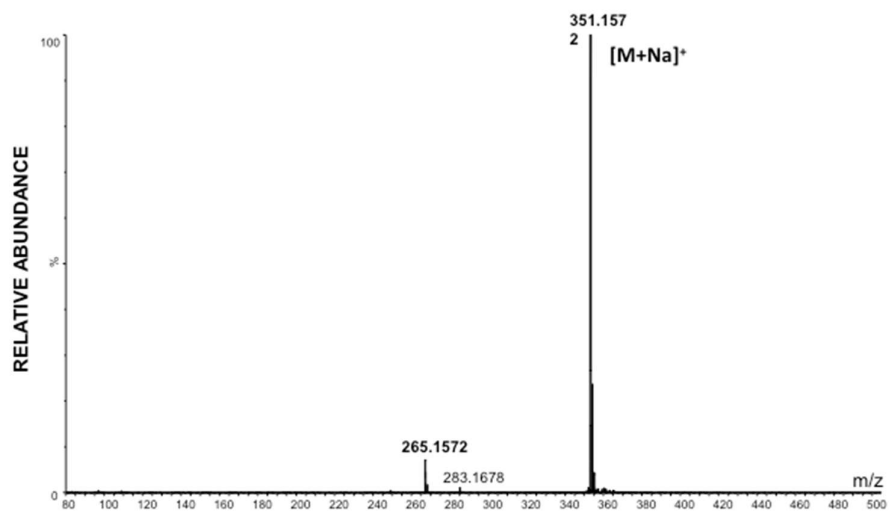

**Supplementary Figure 2:** Positive-ion ESI product ion spectrum of the  $[M+Na]^+$  precursor ions of *trans*-crocin-4 utilizing a Waters Premier quadrupole reflectron time-of-flight (QqRTOF) mass spectrometer.

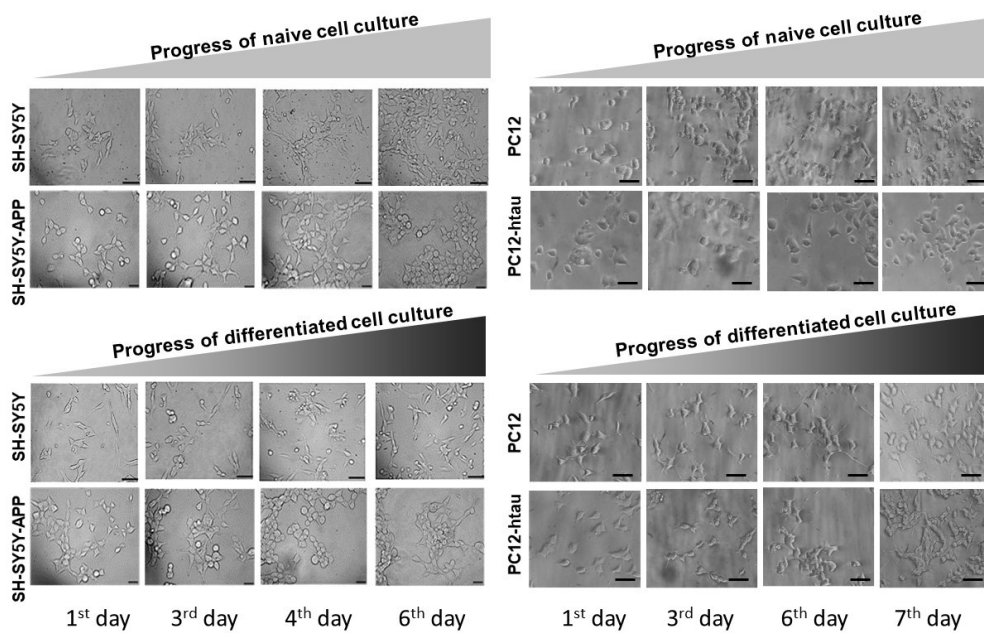

**Supplementary Figure 3: Differentiation of SH-SY5Y, SH-SY5Y-APP, PC12 and PC12-htau to neuron-like cells.** Representative photos of SH-SY5Y and SH-SY5Y-APP (A), PC12 and PC12-htau naive cells (B) at 6 and 7 days, respectively, of proliferation and differentiation (C and D). Differentiated cells exhibit decreased proliferation, and increased dendritic and neuritic-like projections compared to naive cells.

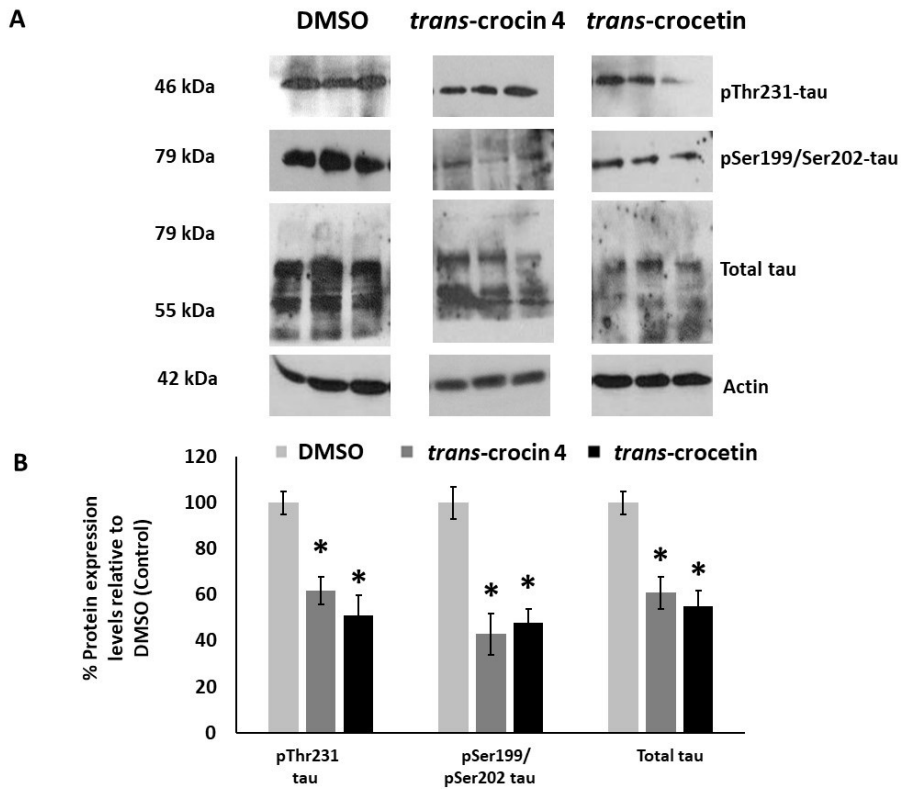

**Supplementary Figure 4: Immunoblotting assessment of the tau levels and phosphorylation after treatment of differentiated PC12 cells with *trans-crocic acid* or *trans-crocetin*.** (A) Immunoblotting detection of pThr231-tau, pSer199/Ser202-tau, total tau, with actin as internal control of protein expression. (B) Diagrammatic presentation of quantified protein expression (\*  $p < 0.05$ , when compared test treatment versus DMSO in post-hoc one-way ANOVA,  $n=3$ ).

**Supplementary Table 1: Primary antibodies and electrophoresis conditions**

| <b>Protein</b>                      | <b>Catalogue number</b> | <b>Company</b>              | <b>MW</b>      | <b>Host</b>            | <b>Gel</b>         |
|-------------------------------------|-------------------------|-----------------------------|----------------|------------------------|--------------------|
| <b>Cellular APP</b>                 | R1(57)                  | By Prof. Efthimiopoulos Lab | ~110 kDa       | Polyclonal anti-rabbit | 10% Tris-Glycine   |
| <b>APP-C99</b>                      | R1(57)                  | By Prof. Efthimiopoulos Lab | 12 kDa         | Polyclonal anti-rabbit | 4-12% Bis-Tris     |
| <b>APP-C83</b>                      | R1(57)                  | By Prof. Efthimiopoulos Lab | 10 kDa         | Polyclonal anti-rabbit | 4-12% Bis-Tris     |
| <b>sAPP<math>\alpha</math></b>      | SIG-39320               | Covance                     | ~100 kDa       | Monoclonal anti-mouse  | 16.5% Tris-Tricine |
| <b>beta-amyloid</b>                 | SIG-39320               | Covance                     | 4 kDa          | Monoclonal anti-mouse  | 16.5% Tris-Tricine |
| <b>BACE1</b>                        | MAB5308                 | Chemicon Millipore          | 56 kDa         | Monoclonal anti-mouse  | 10% Tris-Glycine   |
| <b>PSEN1</b>                        | AB5308                  | Chemicon Millipore          | Multiple forms | Polyclonal anti-rabbit | 10% Tris-Glycine   |
| <b>PSEN2</b>                        | 2192                    | Cell Signaling              | Multiple forms | Polyclonal anti-rabbit | 10% Tris-Glycine   |
| <b>Total tau (Tau5 antibody)</b>    | ab80579                 | Abcam                       | 79 kDa         | Monoclonal anti-mouse  | 10% Tris-Glycine   |
| <b>pSer199/Ser202-tau</b>           | AB9674                  | Chemicon Millipore          | 79 kDa         | Polyclonal anti-rabbit | 10% Tris-Glycine   |
| <b>pThr231-tau</b>                  | ab151559                | Abcam                       | 46 kDa         | Monoclonal anti-rabbit | 10% Tris-Glycine   |
| <b>pERK1/2</b>                      | 4370                    | Cell Signaling              | 44/42 kDa      | Monoclonal anti-rabbit | 10% Tris-Glycine   |
| <b>ERK1/2</b>                       | 4695                    | Cell Signaling              | 44/42 kDa      | Monoclonal anti-rabbit | 10% Tris-Glycine   |
| <b>pSer9-GSK3<math>\beta</math></b> | 9323P                   | Cell Signaling              | 46 kDa         | Monoclonal anti-rabbit | 10% Tris-Glycine   |
| <b>GSK3<math>\beta</math></b>       | 9315S                   | Cell Signaling              | 46 kDa         | Monoclonal anti-rabbit | 10% Tris-Glycine   |

|              |           |                       |        |                          |  |
|--------------|-----------|-----------------------|--------|--------------------------|--|
| <b>Actin</b> | MAB1501   | Chemicon<br>Millipore | 42 kDa | Monoclonal<br>anti-mouse |  |
| <b>GAPDH</b> | SC-365062 | Santa Cruz            | 37 kDa | Monoclonal<br>anti-mouse |  |
